# Supplementary material for: FeS2 microspheres with an ether-based electrolyte for high-performance rechargeable lithium batteries
Source: Royal Society of Chemistry journal article supplement (doi:10.1039/c5ta02169c), 2015-01-01
Supplement: c5ta02169c1.pdf [file c5ta02169c1.pdf]

## Supplementary Information

### FeS<sub>2</sub> Microspheres with Ether-based Electrolyte for High-Performance Rechargeable Lithium Batteries

Zhe Hu, Kai Zhang, Zhiqiang Zhu, Zhanliang Tao, Jun Chen\*

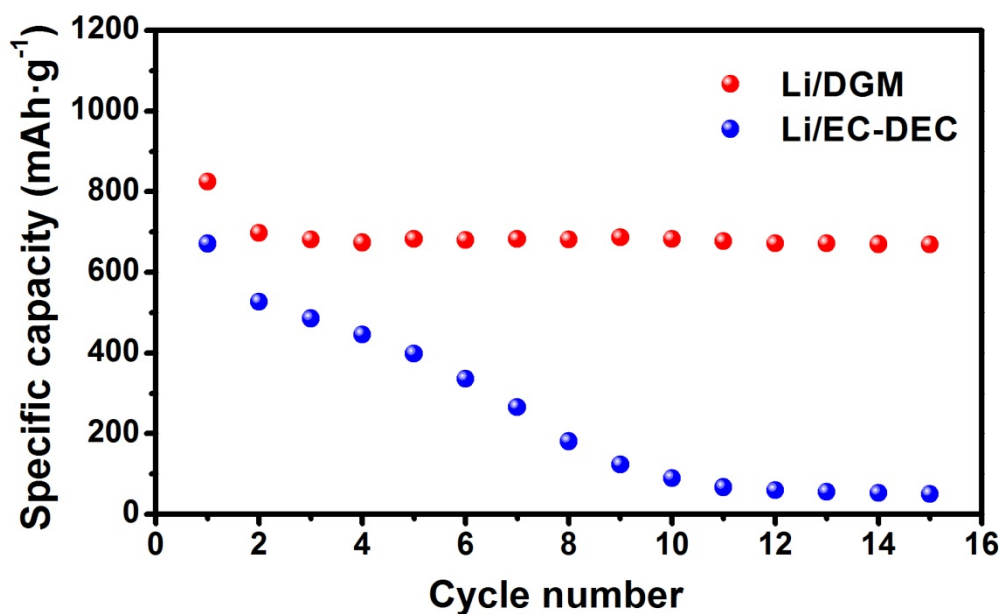

Fig. S1 The cyclic performance of FeS<sub>2</sub> microspheres in Li/DGM and Li/EC-DEC at

100

mA·g<sup>-1</sup>.

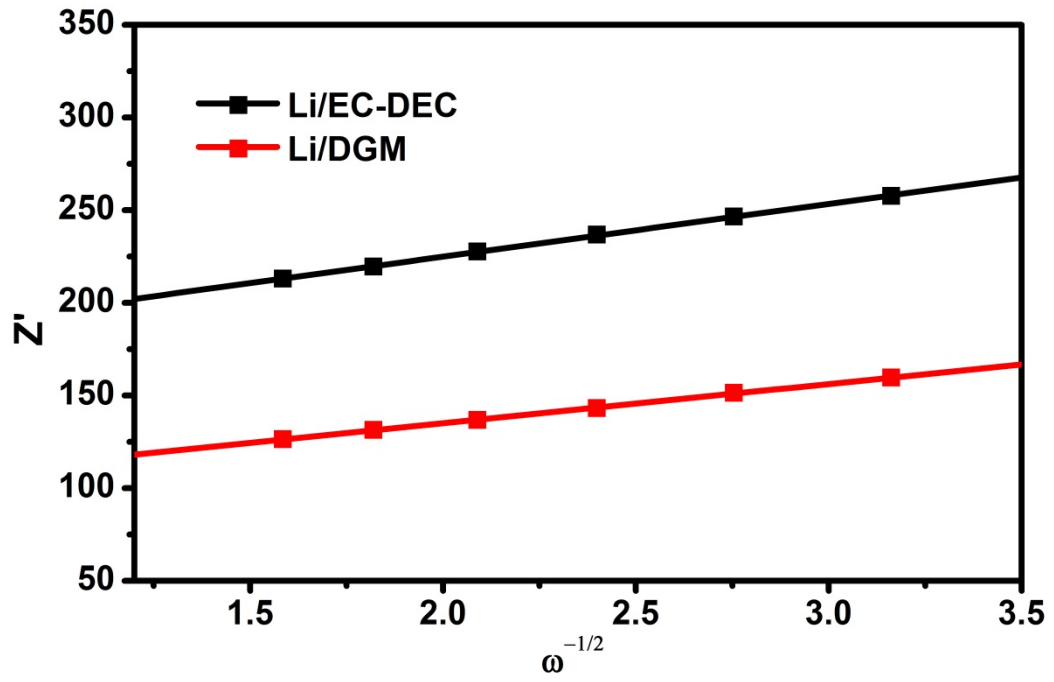

**Fig. S2** The relationship between  $Z'$  and  $\omega^{-1/2}$  of the cell with Li/DGM and Li/EC-DEC.

**Table S1** The parameters procured by simulating EIS data.

| Electrolyte | Cycle number | R <sub>L</sub> (Ω) | R <sub>ct</sub> (Ω) | R <sub>s</sub> (Ω) |
|-------------|--------------|--------------------|---------------------|--------------------|
| Li/DGM      | 1st          | 1.3                | 130.2               | –                  |
|             | 5th          | 1.6                | 92.1                | –                  |
| Li/EC-DEC   | 1st          | 1.5                | 186.3               | –                  |
|             | 5th          | 1.9                | 128.8               | 128.2              |

**Table S2** The Li<sup>+</sup> transfer coefficient of the cell with Li/DGM and Li/EC-DEC.

| Sample    | σ    | D <sub>Li+</sub> (cm <sup>2</sup> ·s <sup>-1</sup> ) |
|-----------|------|------------------------------------------------------|
| Li/DGM    | 21.2 | 2.9×10 <sup>-10</sup>                                |
| Li/EC-DEC | 28.5 | 1.6×10 <sup>-10</sup>                                |

### Lithium ion transfer coefficient:

$$D_{Li^+} = \frac{R^2 T^2}{2A^2 n^4 F^4 C^2 \sigma^2} \quad (\text{Eq. S1})$$

$$Z' = R_D + R_L + \sigma \omega^{-1/2} \quad (\text{Eq. S2})$$

According to the Eq. S1, Eq. S2, and Figure S2, D<sub>Li+</sub> can be calculated. where R is the gas constant, T is the absolute temperature, A is the surface area of the cathode, n is the number of electrons per molecule during oxidization, F is the Faraday constant, C is the concentration of lithium ion, σ is the Warburg factor which is relative with Z'. From Fig. S2, σ is the slope of each fitted curves. And the transfer coefficient is listed in Table S2.

### Power density and energy density:

$$\text{Power density} = \text{Voltage} \times \text{Current density} \quad (\text{Eq. S3})$$

$$\text{Energy density} = \text{Voltage} \times \text{Capacity} \quad (\text{Eq. S4})$$

According to the Eq. S3, Eq. S4, the power density and energy density can be calculated. Here we use average voltage to replace the voltage to calculate the result, and read it from the charge and discharge curves.
